# Supplementary material for: Mindfulness in Sexual Activity, Sexual Satisfaction and Erotic Fantasies in a Non-Clinical Sample
Source: MDPI journal article supplement (doi:10.3390/ijerph18031161), 2021-01-28
Supplement: s1 [file s1]

### **The Cronbach's alpha values in each questionnaire for the research sample**

The Mindfulness Attention Awareness Scale (MAAS) in this sample had a Cronbach's  $\alpha$  coefficient = 0.89 after analyzing the reliability on the applied tests. In relation to the Scale of Body Connection (SBC), the body awareness subscale showed a Cronbach's  $\alpha$  coefficient = 0.85 and its bodily dissociation subscale showed a Cronbach's  $\alpha$  coefficient = 0.71. In relation to the New Sexual Satisfaction Scale (NSSS), the Cronbach's  $\alpha$  coefficient was 0.95. The Hurlbert Index of Sexual Fantasy (HISF) showed a coefficient  $\alpha$  of Cronbach= 0.88 and finally, the Wilson's Sex Fantasy Questionnaire showed a Cronbach's  $\alpha$  coefficient= 0.87. On its subscales: a) exploratory:  $\alpha$  = 0.81, b) intimate:  $\alpha$  = 0.67, c) impersonal:  $\alpha$  = 0.68, d) sadomasochism:  $\alpha$  = 0.89.
